# Supplementary material
Source: PubMed Central journal article supplement (PMC8407965)
Supplement: EMS130218-supplement-Source_Data_Figure_3.pdf [file EMS130218-supplement-Source_Data_Figure_3.pdf]

**Source Data Figure 3.** Uncropped western blot membranes used in Figure 3c and uncropped gel used in Figure 3d

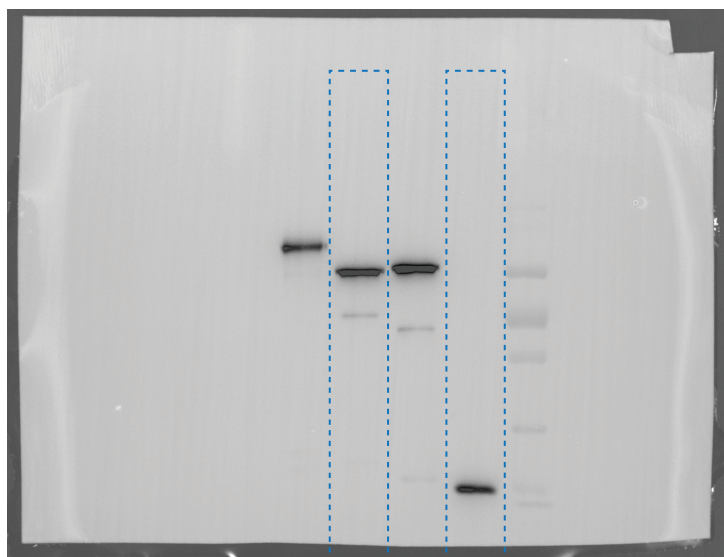

Fig. 3C left

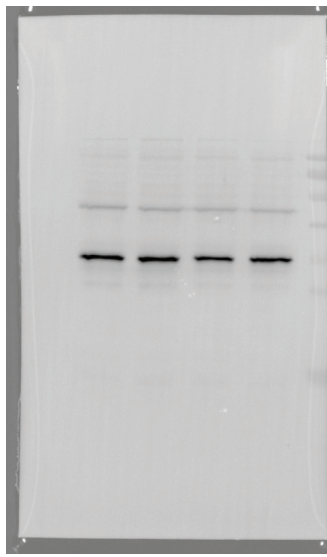

Fig. 3C right

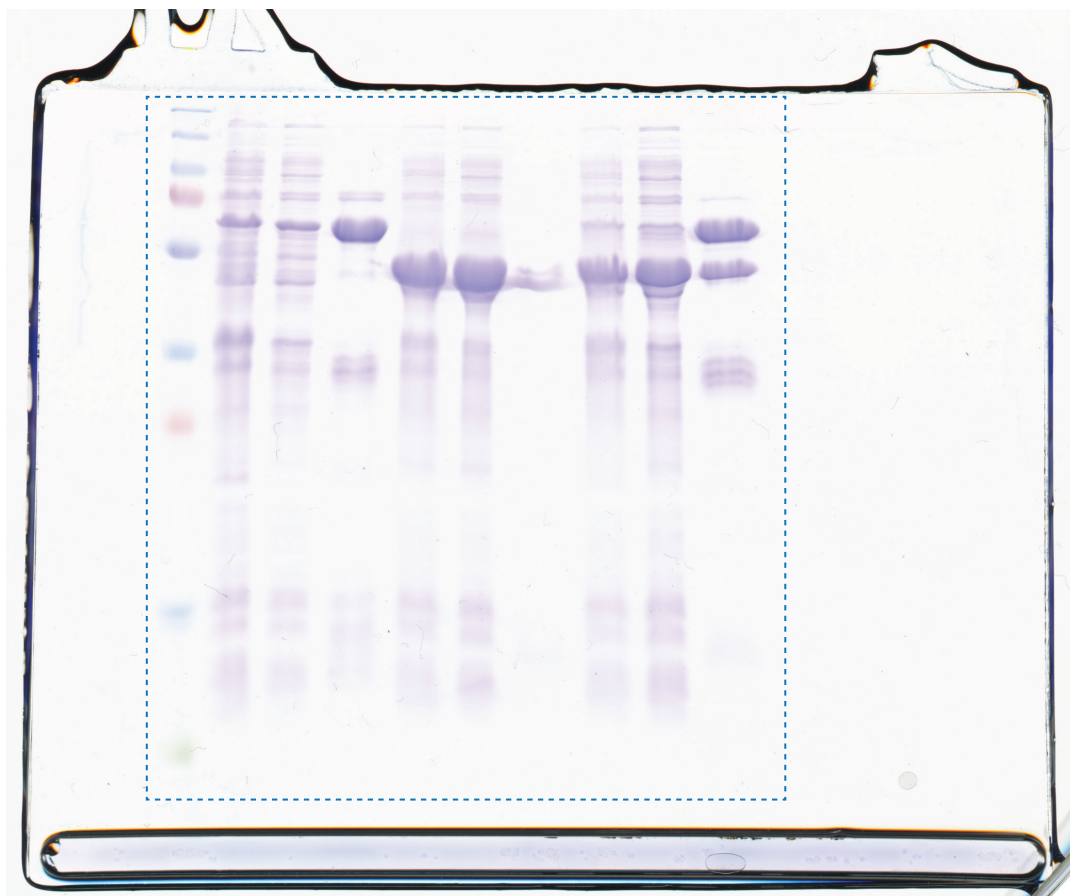

Fig. 3d
